# Supplementary material
Source: PubMed Central journal article supplement (PMC2746375)
Supplement: NIHMS121157-supplement-supple_Fig_S2.pdf [file NIHMS121157-supplement-supple_Fig_S2.pdf]

# Probe Delivery and Uptake (Overall views)

FITC and/or SPION labeled sODN

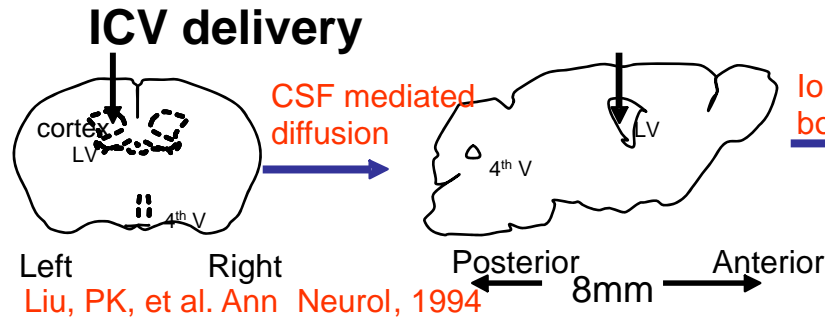

## Attachment

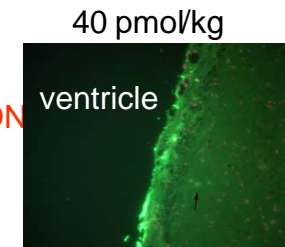

J. Neurosci. 19:1335, 1999

## Distribution (SPION-cfos)

distribution to tissue

Virchow-bin space

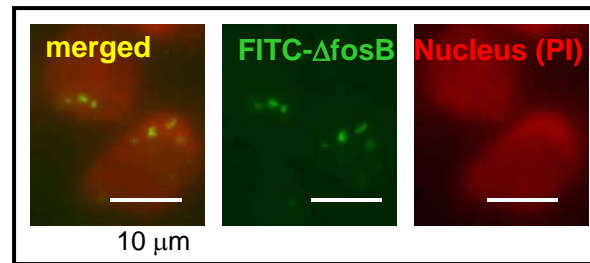

Figure 4 in current manuscript

## Histology

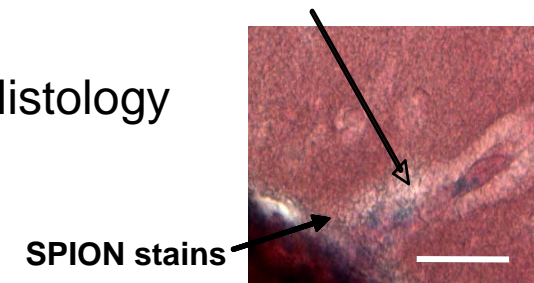

FASEB J. 21:3004, 2007)

SPION-cfos-FITC in the Virchow-Robins space, not in glia

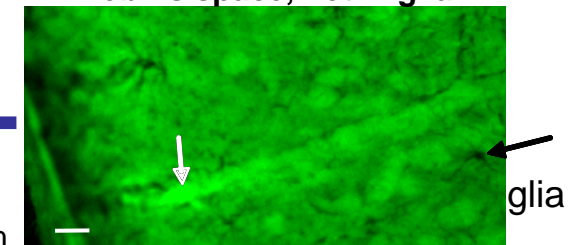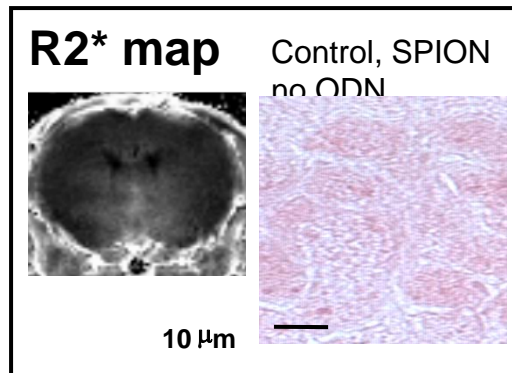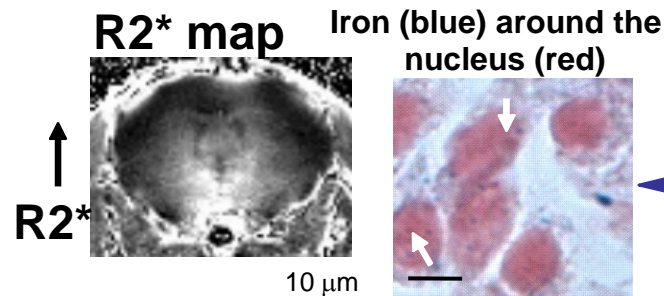

J. Neurosci, 27:713, 2007)

MRI in vivo and Prussian blue + Nuclear red stain
