# Supplementary material
Source: PubMed Central journal article supplement (PMC2746375)

**Figure S1**

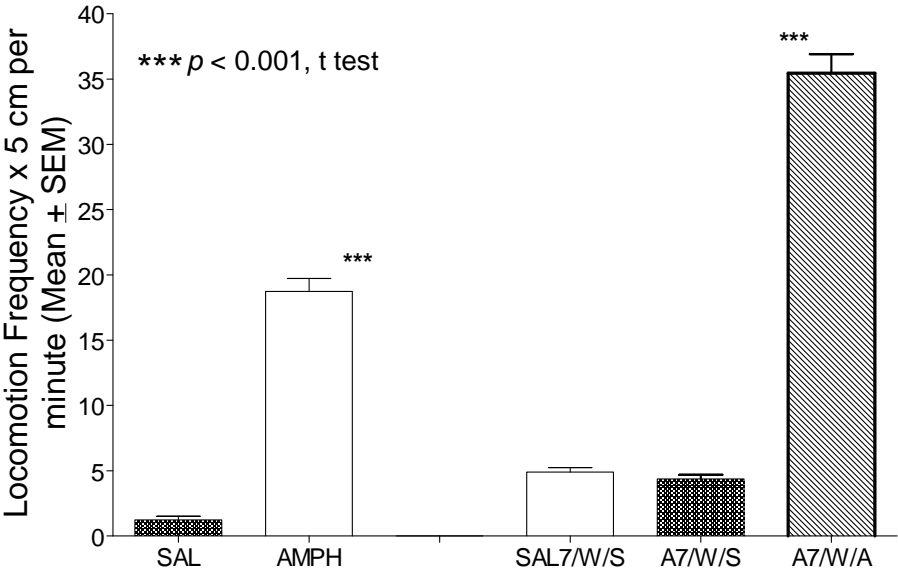

Supplement: NIHMS121157-supplement-suppl_Fig_S1.pdf [file NIHMS121157-supplement-suppl_Fig_S1.pdf]
